# Supplementary material for: Flexible focusing pattern realization of centimeter-scale planar super-oscillatory lenses in parallel fabrication
Source: Royal Society of Chemistry journal article supplement (doi:10.1039/c8nr07985d), 2018-12-11
Supplement: c8nr07985d7.csv [file c8nr07985d7.csv]

	Wavelength£¨nm£©	Focal length	Calculated Rayleigh diffraction limit	Transmittance function ti
		(¦Ìm)
SOL #1	532	5990/6000/6010	0.61/0.71¦Ëk	44540 21008 85142 04084 2442A 42080 01249 4A822 4A548 2A0A1
SOL #2	405/532/640	6000	0.61/0.71¦Ëk	82024 40040 12442 A442A 40114 82529 44521 52148 0A248 A2A14
SOL #3	405/532/640	5990/6000/6010	0.61/0.71¦Ëk	10824 A0048 80894 08092 014A2 A2204 24009 48502 09049 02492
