# Supplementary figures and images for: Flexible focusing pattern realization of centimeter-scale planar super-oscillatory lenses in parallel fabrication
Source: Royal Society of Chemistry journal article supplement (doi:10.1039/c8nr07985d), 2018-12-11

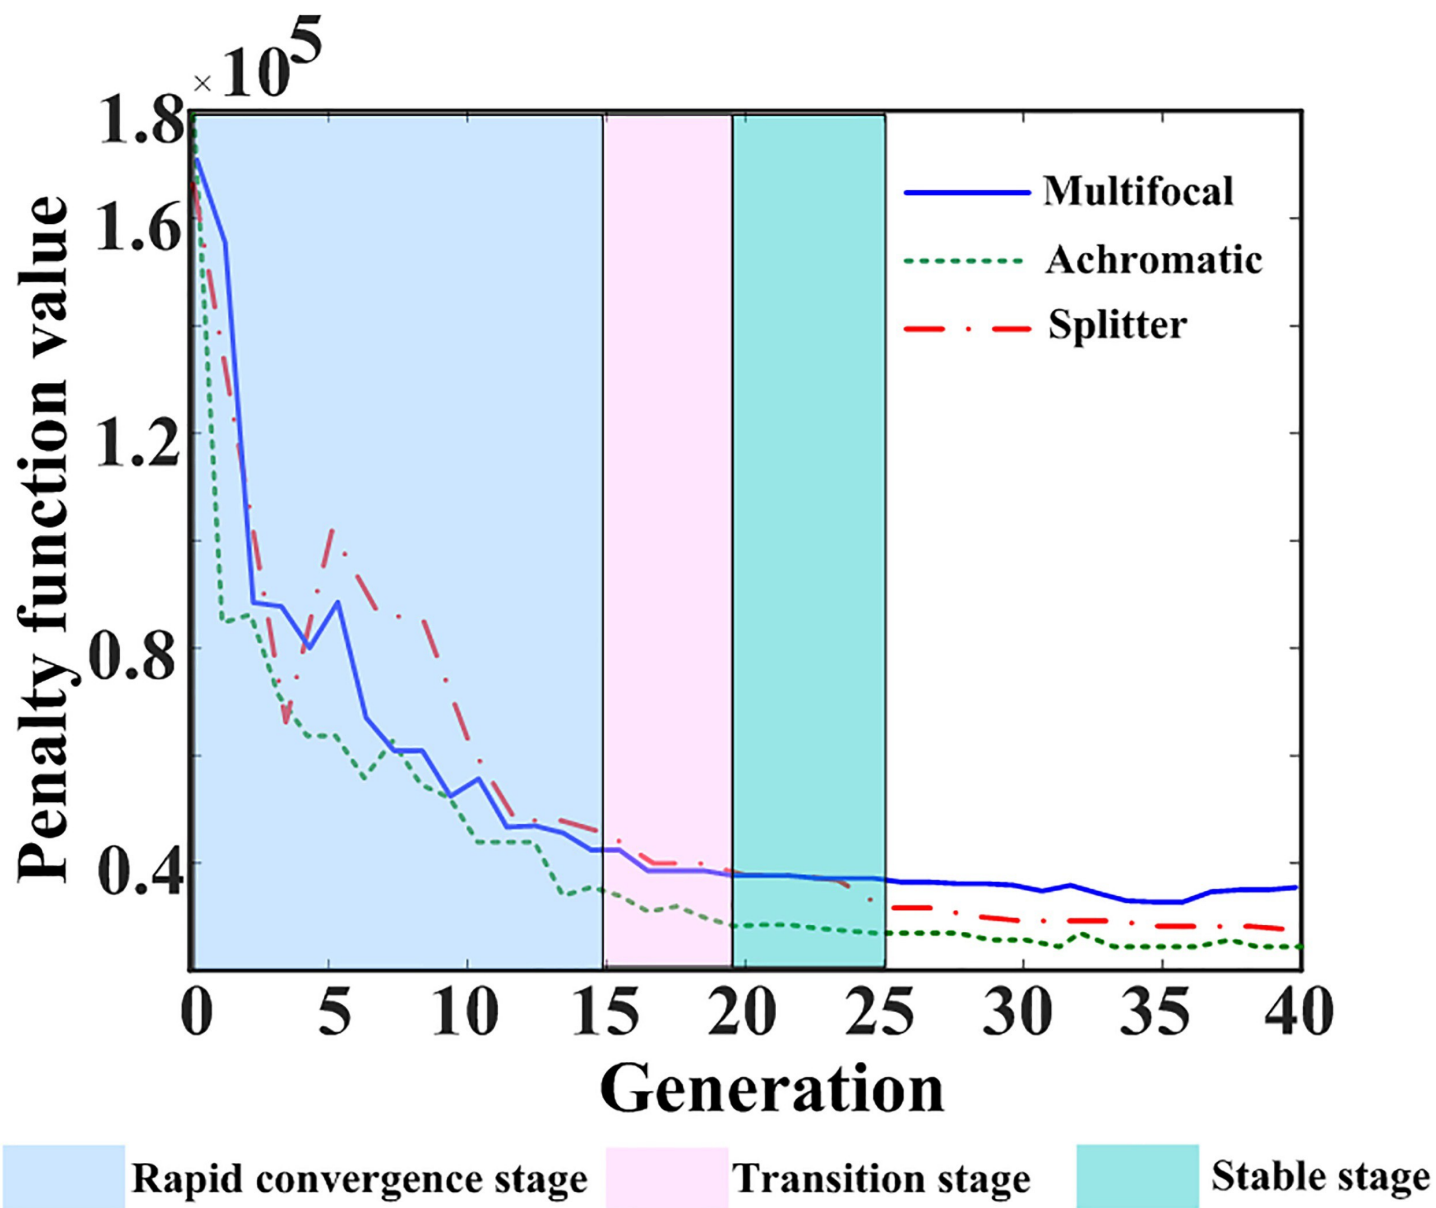

Supplement: c8nr07985d2.pdf [file c8nr07985d2.pdf]

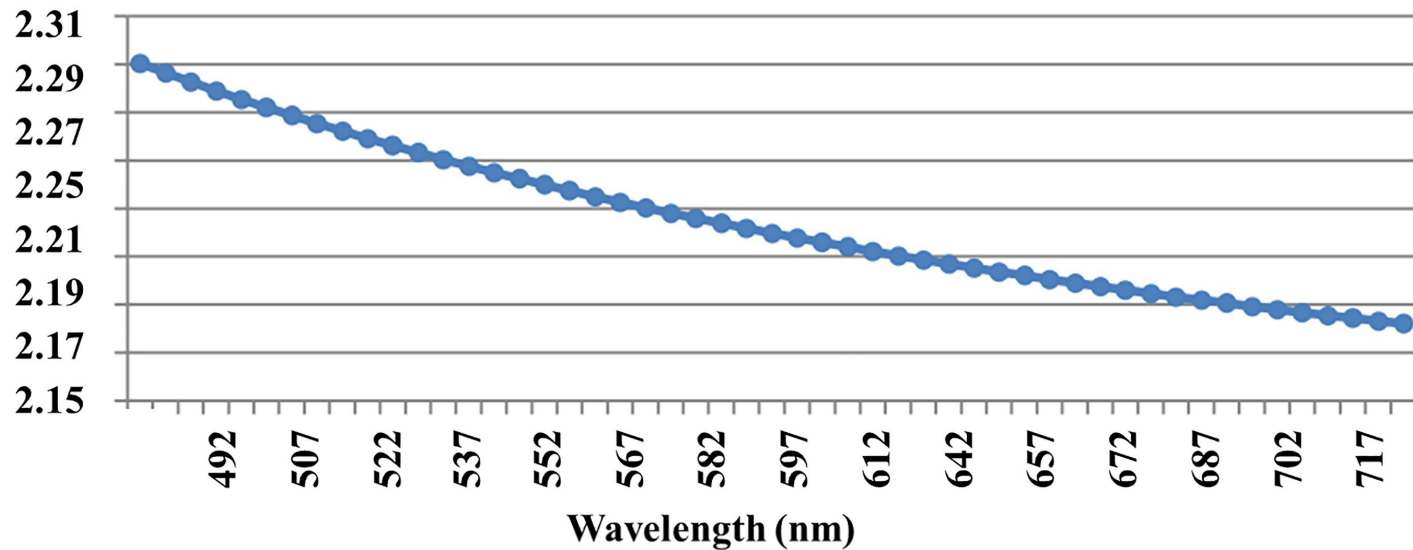

Supplement: c8nr07985d3.pdf [file c8nr07985d3.pdf]

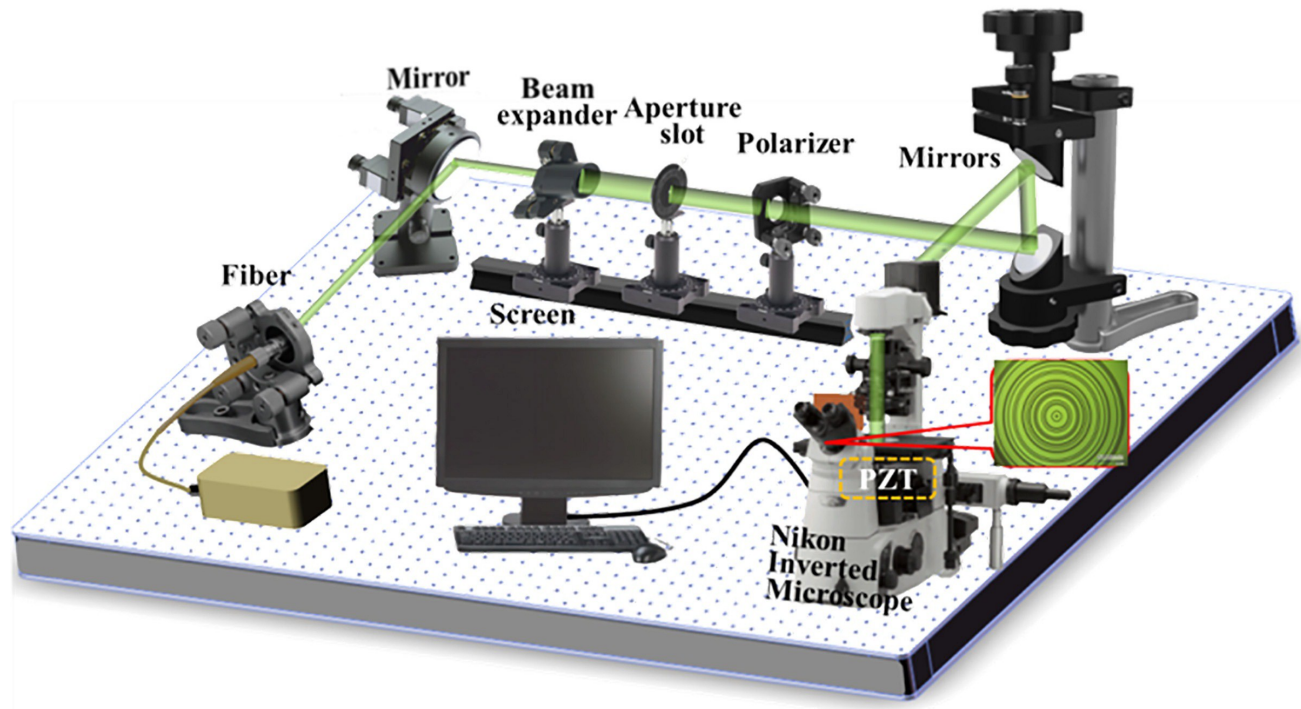

Supplement: c8nr07985d4.pdf [file c8nr07985d4.pdf]
